# Supplementary material
Source: Springer Nature journal article supplement (https://www.springermedizin.de/resource/supplementary/13058_2012_3163_MOESM2_ESM.pdf/9703400)

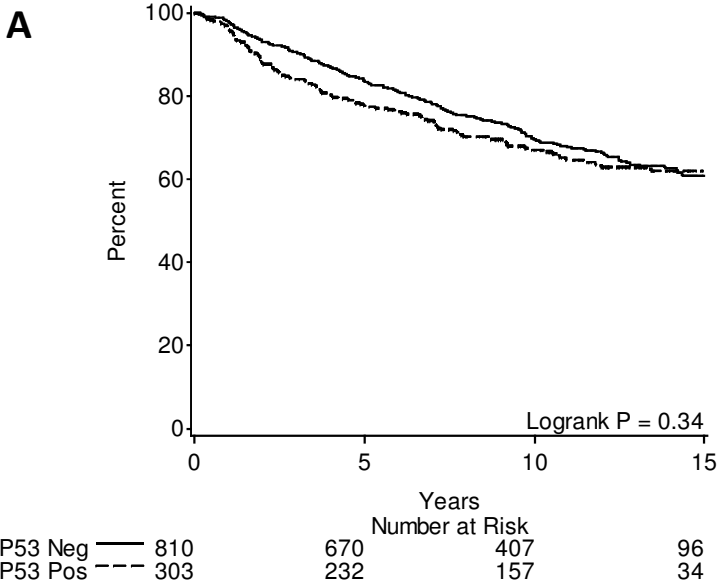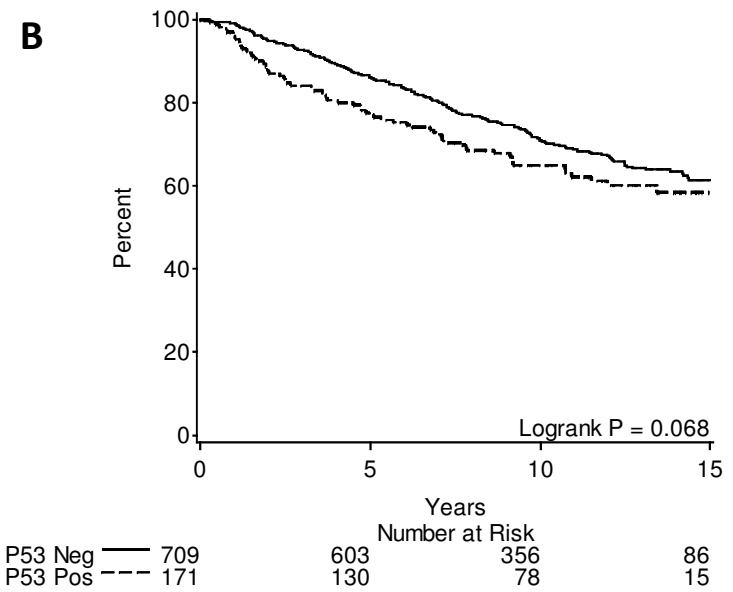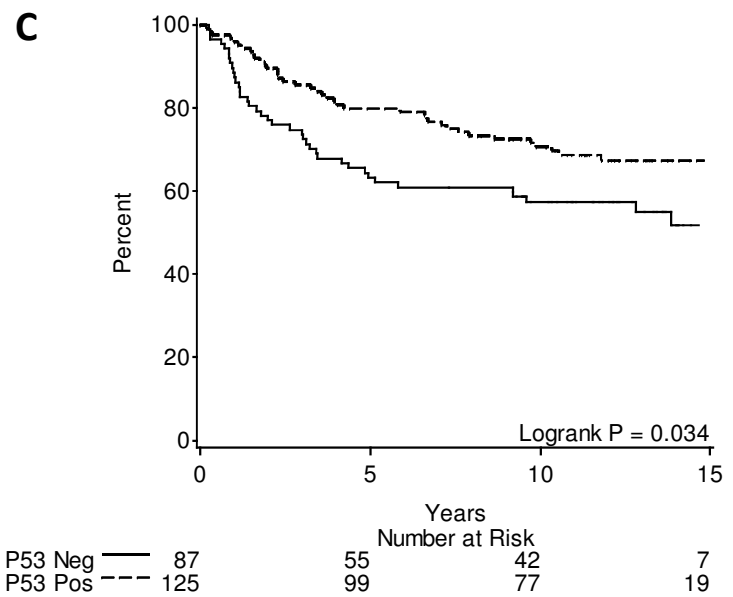

Supplement: MOESM2 [file 9703400]
